# Supplementary material for: Intramolecular interactions in the polar headgroup of sphingosine: serinol
Source: Royal Society of Chemistry journal article supplement (doi:10.1039/c5cc09423b), 2015-12-15

## Supporting Information

# **Intramolecular Interactions in the Polar Headgroup of Sphingosine: Serinol**

D. Loru, I. Peña, J. L. Alonso, M. E. Sanz\*

**Table S1.** Ab initio<sup>a</sup> spectroscopic parameters for the predicted conformers of serinol with energies within 1000 cm<sup>-1</sup>.

| MP2                                                                                 | ga1    | ga2    | ga3    | ga4    | ga5    | gG1    | gG2    | gG3    | gG4    | aa1    |
|-------------------------------------------------------------------------------------|--------|--------|--------|--------|--------|--------|--------|--------|--------|--------|
| A <sup>b</sup> (MHz)                                                                | 6084.2 | 5996.5 | 6042.6 | 6033.1 | 5916.3 | 4242.0 | 4094.0 | 4099.4 | 4088.4 | 7738.4 |
| B (MHz)                                                                             | 2278.9 | 2272.6 | 2258.1 | 2235.3 | 2287.0 | 3134.0 | 3237.3 | 3242.7 | 3198.2 | 1977.6 |
| C (MHz)                                                                             | 1997.3 | 1977.5 | 1983.2 | 1951.3 | 1972.8 | 2550.2 | 2479.7 | 2474.2 | 2469.0 | 1699.4 |
| μ <sub>a</sub> (D)                                                                  | -1.67  | 4.19   | 1.24   | -1.96  | 0.88   | -0.24  | 2.06   | -4.15  | -2.37  | 3.35   |
| μ <sub>b</sub> (D)                                                                  | 0.31   | -0.83  | 1.37   | 0.03   | -2.15  | -2.62  | -0.28  | -0.23  | 1.17   | -0.99  |
| μ <sub>c</sub> (D)                                                                  | 0.81   | -1.37  | 3.02   | 0.89   | -0.24  | -1.51  | 1.84   | 1.62   | 0.55   | 1.74   |
| μ <sub>total</sub> (D)                                                              | 1.88   | 4.48   | 3.54   | 2.15   | 2.33   | 3.03   | 2.77   | 4.46   | 2.70   | 3.90   |
| χ <sub>aa</sub> (MHz)                                                               | -0.34  | -4.17  | -0.68  | -3.99  | 1.77   | -2.60  | -2.54  | -1.92  | -1.57  | -3.53  |
| χ <sub>bb</sub> (MHz)                                                               | 2.44   | 2.54   | 2.47   | 2.57   | -0.24  | 1.45   | 0.01   | -0.51  | -0.84  | 1.72   |
| χ <sub>cc</sub> (MHz)                                                               | -2.10  | 1.64   | -1.79  | 1.43   | -1.53  | 1.15   | 2.53   | 2.43   | 2.41   | 1.80   |
| ΔE <sub>MP2</sub> (cm <sup>-1</sup> )                                               | 0.0    | 270.8  | 213.3  | 472.2  | 866.5  | 73.4   | 525.2  | 726.7  | 778.2  | 368.2  |
| ΔE <sub>MP2+ZPC</sub> (cm <sup>-1</sup> )                                           | 0.0    | 214.9  | 247.6  | 443.3  | 705.6  | 145.7  | 503.3  | 731.9  | 825.0  | 298.3  |
| ΔG <sup>298</sup> (cm <sup>-1</sup> )                                               | 0.0    | 158.7  | 276.5  | 420.5  | 610.6  | 114.6  | 498.7  | 773.4  | 911.5  | 231.5  |
| 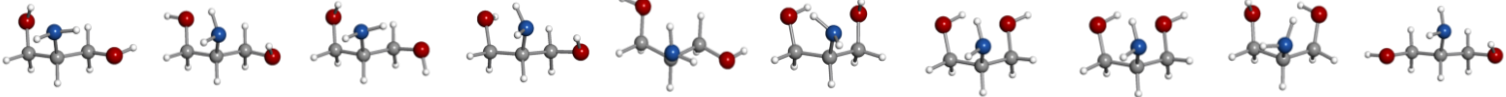 |        |        |        |        |        |        |        |        |        |        |

<sup>a</sup> Optimised structures at the MP2/6-311++G(d,p) level, labelled according to the values of the ∠O<sub>1</sub>CCC angle (first label) and the ∠CCCO<sub>2</sub> angle (second label) as **G** (+60°), **g** (−60°) and **a** (180°). <sup>b</sup> A, B, C are the rotational constants; χ<sub>aa</sub>, χ<sub>bb</sub>, and χ<sub>cc</sub> are <sup>14</sup>N nuclear quadrupole coupling constants; μ<sub>a</sub>, μ<sub>b</sub>, μ<sub>c</sub> are the electric dipole moment components; ΔE<sub>MP2</sub> are the electronic energies, ΔE<sub>MP2+ZPC</sub> are the electronic energies including zero-point corrections, and ΔG<sup>298</sup> are the Gibbs free energies at 298 K.

**Table S1 (cont.).** Ab initio<sup>a</sup> spectroscopic parameters for the predicted conformers of serinol with energies within 1000 cm<sup>-1</sup>.

| MP2                                       | aa2    | aa3    | aa4    | aa5    | ag1    | ag2    | ag3    | gg1    | gg2    | gg3    | Gg1    | Gg2    |
|-------------------------------------------|--------|--------|--------|--------|--------|--------|--------|--------|--------|--------|--------|--------|
| A <sup>b</sup> (MHz)                      | 7642.0 | 7593.2 | 7833.3 | 7874.7 | 5361.2 | 5320.1 | 5438.7 | 4172.4 | 4541.3 | 4101.2 | 3972.9 | 3924.7 |
| B (MHz)                                   | 1951.8 | 1957.1 | 1969.0 | 1954.9 | 2387.1 | 2340.9 | 2311.3 | 3166.5 | 2744.2 | 3164.6 | 3283.6 | 3240.4 |
| C (MHz)                                   | 1686.4 | 1675.5 | 1702.7 | 1677.9 | 1775.3 | 1759.0 | 1744.3 | 2195.6 | 2069.1 | 2169.4 | 1942.5 | 1942.7 |
| μ <sub>a</sub> (D)                        | -1.95  | 1.72   | 0.00   | -0.91  | 3.29   | 1.64   | -1.02  | 1.87   | -0.36  | -1.18  | -1.32  | -1.69  |
| μ <sub>b</sub> (D)                        | -0.43  | 1.31   | -2.01  | -0.20  | 3.22   | 3.02   | 2.00   | 2.18   | 4.02   | 1.15   | 1.89   | 2.87   |
| μ <sub>c</sub> (D)                        | -0.09  | 1.74   | 1.24   | -1.14  | 1.25   | -0.56  | 1.52   | 0.52   | 2.21   | -0.29  | 1.57   | 0.05   |
| μ <sub>total</sub> (D)                    | 2.00   | 2.77   | 2.36   | 1.47   | 4.77   | 3.48   | 2.71   | 2.92   | 4.61   | 1.68   | 2.79   | 3.33   |
| χ <sub>aa</sub> (MHz)                     | -3.42  | -4.12  | 1.76   | 0.52   | -4.22  | -4.20  | -4.21  | 1.86   | 0.69   | -1.82  | 1.34   | 2.78   |
| χ <sub>bb</sub> (MHz)                     | 1.74   | 2.05   | 2.76   | 2.75   | 2.32   | 2.36   | 2.32   | -0.20  | 1.14   | 2.17   | -2.62  | 1.97   |
| χ <sub>cc</sub> (MHz)                     | 1.68   | 2.07   | -4.51  | -3.27  | 1.91   | 1.84   | 1.89   | -1.66  | -1.83  | -0.35  | 1.28   | -4.74  |
| ΔE <sub>MP2</sub> (cm <sup>-1</sup> )     | 537.5  | 752.4  | 912.8  | 919.1  | 700.7  | 717.6  | 920.7  | 418.6  | 913.6  | 940.4  | 878.9  | 965.0  |
| ΔE <sub>MP2+ZPC</sub> (cm <sup>-1</sup> ) | 494.5  | 667.0  | 718.1  | 880.1  | 583.6  | 674.9  | 831.8  | 478.0  | 883.6  | 889.7  | 827.6  | 935.5  |
| ΔG <sup>298</sup> (cm <sup>-1</sup> )     | 457.4  | 609.3  | 600.7  | 831.2  | 495.1  | 637.6  | 741.2  | 449.7  | 873.1  | 825.0  | 811.6  | 917.0  |

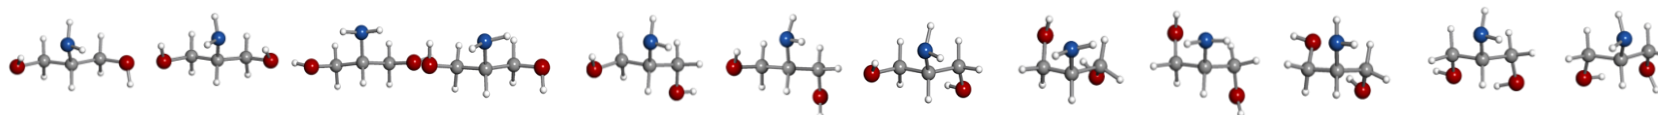

<sup>a</sup> Optimised structures at the MP2/6-311++G(d,p) level, labelled according to the values of the ∠O<sub>1</sub>CCC angle (first label) and the ∠CCCO<sub>2</sub> angle (second label) as **G** (+60°), **g** (-60°) and **a** (180°). <sup>b</sup> A, B, C are the rotational constants; χ<sub>aa</sub>, χ<sub>bb</sub>, and χ<sub>cc</sub> are <sup>14</sup>N nuclear quadrupole coupling constants; μ<sub>a</sub>, μ<sub>b</sub>, μ<sub>c</sub> are the electric dipole moment components; ΔE<sub>MP2</sub> are the electronic energies, ΔE<sub>MP2+ZPC</sub> are the electronic energies including zero-point corrections, and ΔG<sup>298</sup> are the Gibbs free energies at 298 K.

**Table S2.** Measured frequencies and residuals (in MHz) for the rotational transitions of conformer **ga1** of serinol.

| $J'$ | $K'_{-1}$ | $K'_{+1}$ | $J''$ | $K''_{-1}$ | $K''_{+1}$ | $F'$ | $F''$ | $\nu_{\text{obs}}$ | $\nu_{\text{obs}} - \nu_{\text{cal}}$ |
|------|-----------|-----------|-------|------------|------------|------|-------|--------------------|---------------------------------------|
| 1    | 1         | 1         | 0     | 0          | 0          | 2    | 1     | 8031.002           | 0.003                                 |
|      |           |           |       |            |            | 1    | 1     | 8031.689           | -0.011                                |
|      |           |           |       |            |            | 0    | 1     | 8029.963           | 0.016                                 |
| 1    | 1         | 0         | 0     | 0          | 0          | 2    | 1     | 8315.049           | 0.005                                 |
|      |           |           |       |            |            | 0    | 1     | 8314.442           | 0.009                                 |
|      |           |           |       |            |            | 1    | 1     | 8315.963           | 0.001                                 |
| 2    | 0         | 2         | 1     | 0          | 1          | 3    | 2     | 8477.019           | -0.015                                |
| 2    | 1         | 2         | 1     | 1          | 1          | 3    | 2     | 8208.556           | 0.002                                 |
|      |           |           |       |            |            | 1    | 0     | 8209.239           | -0.003                                |
|      |           |           |       |            |            | 1    | 1     | 8207.487           | -0.003                                |
| 2    | 1         | 1         | 1     | 1          | 0          | 3    | 2     | 8776.339           | 0.036                                 |
|      |           |           |       |            |            | 2    | 1     | 8776.132           | -0.031                                |
|      |           |           |       |            |            | 1    | 0     | 8775.819           | 0.017                                 |
|      |           |           |       |            |            | 2    | 2     | 8775.547           | -0.004                                |
|      |           |           |       |            |            | 1    | 1     | 8777.329           | -0.002                                |
| 2    | 2         | 1         | 2     | 1          | 1          | 1    | 1     | 11353.960          | -0.002                                |
| 2    | 1         | 2         | 1     | 0          | 1          | 3    | 2     | 11993.317          | -0.010                                |
|      |           |           |       |            |            | 2    | 1     | 11994.068          | -0.005                                |
|      |           |           |       |            |            | 1    | 0     | 11992.823          | -0.006                                |
| 2    | 1         | 1         | 1     | 0          | 1          | 3    | 2     | 12845.114          | -0.007                                |
|      |           |           |       |            |            | 2    | 1     | 12844.439          | -0.020                                |
|      |           |           |       |            |            | 1    | 0     | 12845.427          | 0.023                                 |
| 2    | 2         | 1         | 2     | 1          | 1          | 3    | 3     | 11354.447          | 0.013                                 |
|      |           |           |       |            |            | 2    | 2     | 11355.283          | 0.002                                 |
|      |           |           |       |            |            | 1    | 1     | 11353.960          | -0.002                                |
| 3    | 0         | 3         | 2     | 0          | 2          | 4    | 3     | 12677.380          | -0.002                                |
| 3    | 1         | 3         | 2     | 1          | 2          | 4    | 3     | 12303.497          | 0.025                                 |
|      |           |           |       |            |            | 3    | 2     | 12303.497          | 0.025                                 |
|      |           |           |       |            |            | 3    | 3     | 12304.136          | 0.002                                 |
|      |           |           |       |            |            | 2    | 2     | 12302.581          | 0.007                                 |
| 3    | 1         | 2         | 2     | 1          | 1          | 4    | 3     | 13154.436          | -0.007                                |
|      |           |           |       |            |            | 3    | 2     | 13154.436          | -0.022                                |
|      |           |           |       |            |            | 3    | 3     | 13153.682          | -0.022                                |
|      |           |           |       |            |            | 2    | 2     | 13155.499          | -0.004                                |
| 3    | 2         | 2         | 2     | 2          | 1          | 4    | 3     | 12738.552          | -0.008                                |
|      |           |           |       |            |            | 3    | 2     | 12738.552          | -0.008                                |
| 3    | 2         | 1         | 2     | 2          | 0          | 4    | 3     | 12799.848          | -0.003                                |
|      |           |           |       |            |            | 2    | 1     | 12799.848          | -0.003                                |
| 3    | 0         | 3         | 2     | 1          | 2          | 4    | 3     | 9161.090           | 0.001                                 |
|      |           |           |       |            |            | 3    | 2     | 9160.468           | 0.003                                 |
|      |           |           |       |            |            | 2    | 1     | 9161.453           | 0.011                                 |
| 3    | 1         | 3         | 2     | 0          | 2          | 3    | 2     | 15820.464          | -0.009                                |
| 3    | 1         | 2         | 2     | 0          | 2          | 4    | 3     | 17522.574          | 0.007                                 |
|      |           |           |       |            |            | 3    | 2     | 17521.827          | 0.012                                 |
| 3    | 2         | 2         | 3     | 1          | 2          | 4    | 4     | 10938.556          | -0.010                                |
|      |           |           |       |            |            | 3    | 3     | 10939.361          | 0.009                                 |
|      |           |           |       |            |            | 2    | 2     | 10938.286          | -0.004                                |
| 4    | 0         | 4         | 3     | 0          | 3          | 5    | 4     | 16833.653          | 0.018                                 |
| 4    | 1         | 4         | 3     | 1          | 3          | 5    | 4     | 16387.840          | 0.023                                 |
|      |           |           |       |            |            | 4    | 4     | 16388.516          | -0.013                                |
|      |           |           |       |            |            | 3    | 3     | 16386.954          | -0.001                                |
| 4    | 1         | 3         | 3     | 1          | 2          | 5    | 4     | 17520.041          | 0.005                                 |
| 4    | 2         | 3         | 3     | 2          | 2          | 5    | 4     | 16972.767          | -0.005                                |
| 4    | 2         | 2         | 3     | 2          | 1          | 5    | 4     | 17123.824          | -0.029                                |
| 4    | 0         | 4         | 3     | 1          | 3          | 5    | 4     | 13691.236          | -0.023                                |

|   |   |   |   |   |   |   |   |           |        |
|---|---|---|---|---|---|---|---|-----------|--------|
|   |   |   |   |   |   | 4 | 3 | 13690.746 | 0.022  |
| 4 | 2 | 3 | 4 | 1 | 3 | 5 | 5 | 10391.284 | -0.017 |
|   |   |   |   |   |   | 4 | 4 | 10392.061 | 0.001  |
| 5 | 2 | 4 | 5 | 1 | 4 | 6 | 6 | 9720.480  | 0.021  |
|   |   |   |   |   |   | 5 | 5 | 9720.205  | 0.009  |
|   |   |   |   |   |   | 4 | 4 | 9720.287  | -0.023 |

---

**Table S3.** Measured frequencies and residuals (in MHz) for the rotational transitions of conformer **ga2** of serinol.

| $J'$ | $K'_{-1}$ | $K'_{+1}$ | $J''$ | $K''_{-1}$ | $K''_{+1}$ | $F'$ | $F''$ | $\nu_{\text{obs}}$ | $\nu_{\text{obs}} - \nu_{\text{cal}}$ |
|------|-----------|-----------|-------|------------|------------|------|-------|--------------------|---------------------------------------|
| 1    | 1         | 1         | 0     | 0          | 0          | 2    | 1     | 7947.389           | 0.002                                 |
|      |           |           |       |            |            | 1    | 1     | 7948.106           | 0.002                                 |
|      |           |           |       |            |            | 0    | 1     | 7946.312           | -0.002                                |
| 1    | 1         | 0         | 0     | 0          | 0          | 2    | 1     | 8238.674           | 0.000                                 |
|      |           |           |       |            |            | 1    | 1     | 8239.137           | 0.003                                 |
|      |           |           |       |            |            | 0    | 1     | 8237.984           | -0.001                                |
| 2    | 0         | 2         | 1     | 0          | 1          | 3    | 2     | 8429.507           | 0.008                                 |
|      |           |           |       |            |            | 1    | 0     | 8428.451           | 0.023                                 |
|      |           |           |       |            |            | 1    | 1     | 8431.371           | 0.003                                 |
| 2    | 1         | 2         | 1     | 1          | 1          | 3    | 2     | 8154.828           | 0.004                                 |
|      |           |           |       |            |            | 2    | 1     | 8153.618           | 0.003                                 |
|      |           |           |       |            |            | 1    | 0     | 8156.171           | -0.001                                |
| 2    | 1         | 1         | 1     | 1          | 0          | 3    | 2     | 8737.328           | -0.001                                |
|      |           |           |       |            |            | 2    | 1     | 8736.103           | 0.000                                 |
|      |           |           |       |            |            | 1    | 0     | 8738.445           | -0.001                                |
|      |           |           |       |            |            | 2    | 2     | 8736.562           | 0.000                                 |
| 2    | 1         | 2         | 1     | 0          | 1          | 3    | 2     | 11879.097          | 0.006                                 |
|      |           |           |       |            |            | 2    | 1     | 11879.764          | -0.011                                |
|      |           |           |       |            |            | 1    | 0     | 11877.603          | 0.002                                 |
| 2    | 2         | 0         | 2     | 1          | 1          | 3    | 3     | 11189.628          | -0.017                                |
|      |           |           |       |            |            | 2    | 2     | 11191.659          | 0.000                                 |
| 2    | 1         | 1         | 1     | 0          | 1          | 3    | 2     | 12752.881          | -0.003                                |
|      |           |           |       |            |            | 2    | 1     | 12753.288          | -0.004                                |
|      |           |           |       |            |            | 1    | 0     | 12751.542          | -0.004                                |
|      |           |           |       |            |            | 2    | 2     | 12752.112          | -0.004                                |
|      |           |           |       |            |            | 1    | 1     | 12754.487          | 0.001                                 |
| 2    | 2         | 1         | 2     | 1          | 1          | 3    | 3     | 11173.217          | -0.005                                |
|      |           |           |       |            |            | 2    | 2     | 11175.239          | -0.010                                |
|      |           |           |       |            |            | 1    | 1     | 11172.074          | -0.021                                |
| 3    | 0         | 3         | 2     | 0          | 2          | 4    | 3     | 12603.427          | -0.012                                |
|      |           |           |       |            |            | 3    | 3     | 12602.166          | 0.001                                 |
|      |           |           |       |            |            | 2    | 2     | 12605.132          | 0.001                                 |
| 3    | 1         | 3         | 2     | 1          | 2          | 4    | 3     | 12221.987          | -0.001                                |
|      |           |           |       |            |            | 3    | 2     | 12221.647          | 0.010                                 |
|      |           |           |       |            |            | 2    | 1     | 12221.987          | -0.001                                |
|      |           |           |       |            |            | 3    | 3     | 12221.149          | 0.005                                 |
|      |           |           |       |            |            | 2    | 2     | 12222.773          | 0.010                                 |
| 3    | 1         | 2         | 2     | 1          | 1          | 4    | 3     | 13095.133          | -0.006                                |
|      |           |           |       |            |            | 3    | 2     | 13094.780          | -0.009                                |
|      |           |           |       |            |            | 3    | 3     | 13094.021          | -0.001                                |
|      |           |           |       |            |            | 2    | 2     | 13096.283          | -0.015                                |
| 3    | 2         | 2         | 2     | 2          | 1          | 4    | 3     | 12669.009          | -0.004                                |
|      |           |           |       |            |            | 3    | 2     | 12667.748          | -0.006                                |
|      |           |           |       |            |            | 2    | 1     | 12669.709          | -0.005                                |
| 3    | 2         | 1         | 2     | 2          | 0          | 4    | 3     | 12734.358          | 0.002                                 |
|      |           |           |       |            |            | 3    | 2     | 12733.069          | -0.006                                |
|      |           |           |       |            |            | 2    | 1     | 12735.057          | -0.003                                |
| 3    | 1         | 3         | 2     | 0          | 2          | 4    | 3     | 15671.594          | 0.023                                 |
|      |           |           |       |            |            | 3    | 2     | 15671.992          | 0.008                                 |
|      |           |           |       |            |            | 2    | 1     | 15671.152          | -0.017                                |
| 3    | 2         | 2         | 3     | 1          | 2          | 4    | 4     | 10747.090          | -0.005                                |
|      |           |           |       |            |            | 3    | 3     | 10748.228          | 0.014                                 |
|      |           |           |       |            |            | 2    | 2     | 10746.704          | 0.000                                 |
| 3    | 2         | 1         | 3     | 1          | 2          | 4    | 4     | 10828.896          | 0.035                                 |
|      |           |           |       |            |            | 3    | 3     | 10829.950          | 0.004                                 |

|   |   |   |   |   |   |   |   |           |        |
|---|---|---|---|---|---|---|---|-----------|--------|
|   |   |   |   |   |   | 2 | 2 | 10828.490 | 0.008  |
| 4 | 0 | 4 | 3 | 0 | 3 | 5 | 4 | 16730.459 | -0.014 |
|   |   |   |   |   |   | 4 | 4 | 16729.205 | 0.008  |
|   |   |   |   |   |   | 3 | 3 | 16732.063 | -0.011 |
| 4 | 1 | 4 | 3 | 1 | 3 | 5 | 4 | 16277.963 | -0.032 |
|   |   |   |   |   |   | 4 | 4 | 16277.004 | -0.010 |
|   |   |   |   |   |   | 3 | 3 | 16279.071 | -0.009 |
| 4 | 2 | 3 | 3 | 2 | 2 | 5 | 4 | 16878.980 | 0.021  |
|   |   |   |   |   |   | 4 | 3 | 16878.407 | -0.020 |
| 4 | 2 | 2 | 3 | 2 | 1 | 5 | 4 | 17040.172 | 0.075  |
|   |   |   |   |   |   | 4 | 3 | 17039.540 | 0.001  |

---

**Table S4.** Measured frequencies and residuals (in MHz) for the rotational transitions of conformer **gG1** of serinol.

| $J'$ | $K'_{-1}$ | $K'_{+1}$ | $J''$ | $K''_{-1}$ | $K''_{+1}$ | $F'$ | $F''$ | $\nu_{\text{obs}}$ | $\nu_{\text{obs}} - \nu_{\text{cal}}$ |
|------|-----------|-----------|-------|------------|------------|------|-------|--------------------|---------------------------------------|
| 1    | 1         | 1         | 0     | 0          | 0          | 2    | 1     | 6735.891           | 0.000                                 |
|      |           |           |       |            |            | 1    | 1     | 6736.263           | 0.004                                 |
|      |           |           |       |            |            | 0    | 1     | 6735.336           | -0.002                                |
| 1    | 1         | 0         | 0     | 0          | 0          | 2    | 1     | 7339.254           | 0.013                                 |
|      |           |           |       |            |            | 1    | 1     | 7339.597           | 0.014                                 |
|      |           |           |       |            |            | 0    | 1     | 7338.740           | 0.011                                 |
| 2    | 0         | 2         | 1     | 0          | 1          | 3    | 2     | 11124.882          | 0.011                                 |
|      |           |           |       |            |            | 2    | 1     | 11124.882          | 0.011                                 |
|      |           |           |       |            |            | 1    | 1     | 11125.978          | 0.008                                 |
| 2    | 1         | 2         | 1     | 1          | 1          | 3    | 2     | 10712.913          | 0.013                                 |
|      |           |           |       |            |            | 2    | 1     | 10712.178          | 0.012                                 |
| 2    | 1         | 1         | 1     | 1          | 0          | 3    | 2     | 11919.592          | -0.004                                |
|      |           |           |       |            |            | 2    | 1     | 11918.845          | -0.014                                |
|      |           |           |       |            |            | 1    | 0     | 11920.279          | -0.047                                |
| 2    | 0         | 2         | 1     | 1          | 1          | 3    | 2     | 10047.166          | 0.006                                 |
|      |           |           |       |            |            | 2    | 1     | 10046.090          | 0.004                                 |
|      |           |           |       |            |            | 1    | 0     | 10048.110          | 0.006                                 |
|      |           |           |       |            |            | 2    | 2     | 10046.460          | 0.006                                 |
| 2    | 1         | 2         | 1     | 0          | 1          | 3    | 2     | 11790.607          | -0.002                                |
|      |           |           |       |            |            | 2    | 1     | 11790.952          | -0.001                                |
|      |           |           |       |            |            | 1    | 0     | 11789.749          | 0.001                                 |
|      |           |           |       |            |            | 2    | 2     | 11790.234          | -0.009                                |
|      |           |           |       |            |            | 1    | 1     | 11791.522          | -0.000                                |
| 2    | 2         | 1         | 1     | 1          | 0          | 3    | 2     | 15152.992          | -0.012                                |
|      |           |           |       |            |            | 2    | 1     | 15153.421          | -0.003                                |
|      |           |           |       |            |            | 2    | 2     | 15153.761          | -0.004                                |
|      |           |           |       |            |            | 1    | 1     | 15152.227          | -0.014                                |
| 2    | 2         | 0         | 1     | 1          | 1          | 3    | 2     | 15947.639          | -0.003                                |
|      |           |           |       |            |            | 2    | 1     | 15947.976          | -0.003                                |
|      |           |           |       |            |            | 2    | 2     | 15948.340          | -0.007                                |
|      |           |           |       |            |            | 1    | 1     | 15946.879          | -0.003                                |
| 2    | 0         | 2         | 1     | 1          | 0          | 3    | 2     | 9443.793           | -0.016                                |
|      |           |           |       |            |            | 2    | 1     | 9442.747           | -0.015                                |
|      |           |           |       |            |            | 1    | 0     | 9444.710           | -0.002                                |
|      |           |           |       |            |            | 2    | 2     | 9443.106           | 0.003                                 |
| 2    | 1         | 1         | 1     | 0          | 1          | 3    | 2     | 13600.670          | 0.015                                 |
|      |           |           |       |            |            | 2    | 1     | 13600.994          | 0.023                                 |
|      |           |           |       |            |            | 1    | 0     | 13599.826          | 0.015                                 |
|      |           |           |       |            |            | 2    | 2     | 13600.282          | 0.022                                 |
|      |           |           |       |            |            | 1    | 1     | 13601.604          | 0.020                                 |
| 2    | 2         | 1         | 1     | 1          | 1          | 3    | 2     | 15756.376          | 0.020                                 |
|      |           |           |       |            |            | 2    | 1     | 15756.733          | -0.015                                |
|      |           |           |       |            |            | 2    | 2     | 15757.117          | 0.000                                 |
|      |           |           |       |            |            | 1    | 1     | 15755.562          | -0.003                                |
| 2    | 2         | 0         | 1     | 1          | 0          | 3    | 2     | 15344.290          | -0.001                                |
|      |           |           |       |            |            | 2    | 1     | 15344.640          | -0.015                                |
|      |           |           |       |            |            | 2    | 2     | 15344.987          | -0.009                                |
|      |           |           |       |            |            | 1    | 1     | 15343.544          | -0.014                                |
| 3    | 0         | 3         | 2     | 0          | 2          | 4    | 3     | 16308.833          | 0.004                                 |
| 3    | 0         | 3         | 2     | 1          | 2          | 4    | 3     | 15643.080          | -0.008                                |
|      |           |           |       |            |            | 3    | 2     | 15642.765          | -0.006                                |
|      |           |           |       |            |            | 3    | 3     | 15642.400          | -0.005                                |
|      |           |           |       |            |            | 2    | 2     | 15643.682          | -0.010                                |
| 3    | 0         | 3         | 2     | 1          | 1          | 4    | 3     | 13833.042          | 0.000                                 |
|      |           |           |       |            |            | 3    | 2     | 13832.737          | -0.017                                |



|   |   |   |   |   |   |   |   |           |        |
|---|---|---|---|---|---|---|---|-----------|--------|
| 3 | 1 | 3 | 2 | 0 | 2 | 4 | 3 | 16629.514 | 0.031  |
|   |   |   |   |   |   | 3 | 3 | 16628.932 | 0.011  |
|   |   |   |   |   |   | 2 | 2 | 16630.403 | 0.019  |
| 3 | 1 | 2 | 2 | 2 | 1 | 4 | 3 | 14500.108 | -0.005 |
|   |   |   |   |   |   | 3 | 2 | 14498.766 | -0.007 |
|   |   |   |   |   |   | 2 | 1 | 14500.736 | -0.002 |
|   |   |   |   |   |   | 3 | 3 | 14499.537 | 0.004  |

---

**Table S5.** Measured frequencies and residuals (in MHz) for the rotational transitions of conformer **aa1** of serinol.

| $J'$ | $K'_{-1}$ | $K'_{+1}$ | $J''$ | $K''_{-1}$ | $K''_{+1}$ | $F'$ | $F''$ | $v'$ | $v''$ | $V_{\text{obs}}$ | $V_{\text{obs}} - V_{\text{cal}}$ |   |   |   |   |           |        |
|------|-----------|-----------|-------|------------|------------|------|-------|------|-------|------------------|-----------------------------------|---|---|---|---|-----------|--------|
| 1    | 1         | 0         | 0     | 0          | 0          | 2    | 1     | 0    | 0     | 9648.302         | 0.000                             |   |   |   |   |           |        |
|      |           |           |       |            |            | 2    | 1     | 1    | 1     | 9648.302         | 0.000                             |   |   |   |   |           |        |
|      |           |           |       |            |            | 1    | 1     | 0    | 0     | 9648.781         | -0.003                            |   |   |   |   |           |        |
|      |           |           |       |            |            | 1    | 1     | 1    | 1     | 9648.781         | -0.003                            |   |   |   |   |           |        |
|      |           |           |       |            |            | 0    | 1     | 0    | 0     | 9647.584         | 0.006                             |   |   |   |   |           |        |
|      |           |           |       |            |            | 0    | 1     | 1    | 1     | 9647.584         | 0.006                             |   |   |   |   |           |        |
| 1    | 1         | 1         | 0     | 0          | 0          | 2    | 1     | 0    | 0     | 9368.394         | -0.003                            |   |   |   |   |           |        |
|      |           |           |       |            |            | 2    | 1     | 1    | 1     | 9368.394         | -0.003                            |   |   |   |   |           |        |
|      |           |           |       |            |            | 1    | 1     | 0    | 0     | 9368.886         | -0.005                            |   |   |   |   |           |        |
|      |           |           |       |            |            | 1    | 1     | 1    | 1     | 9368.886         | -0.005                            |   |   |   |   |           |        |
|      |           |           |       |            |            | 0    | 1     | 0    | 0     | 9367.656         | -0.009                            |   |   |   |   |           |        |
|      |           |           |       |            |            | 0    | 1     | 1    | 1     | 9367.656         | -0.009                            |   |   |   |   |           |        |
| 2    | 0         | 2         | 1     | 0          | 1          | 3    | 2     | 0    | 1     | 7305.578         | 0.001                             |   |   |   |   |           |        |
|      |           |           |       |            |            | 3    | 2     | 1    | 0     | 7306.183         | 0.017                             |   |   |   |   |           |        |
|      |           |           |       |            |            | 1    | 1     | 0    | 1     | 7307.112         | -0.013                            |   |   |   |   |           |        |
|      |           |           |       |            |            | 1    | 1     | 1    | 0     | 7307.705         | -0.008                            |   |   |   |   |           |        |
|      |           |           |       |            |            | 3    | 2     | 0    | 1     | 7035.831         | 0.001                             |   |   |   |   |           |        |
|      |           |           |       |            |            | 3    | 2     | 1    | 0     | 7036.426         | 0.008                             |   |   |   |   |           |        |
| 2    | 1         | 2         | 1     | 1          | 1          | 2    | 1     | 0    | 1     | 7034.821         | -0.003                            |   |   |   |   |           |        |
|      |           |           |       |            |            | 2    | 1     | 1    | 0     | 7035.391         | -0.022                            |   |   |   |   |           |        |
|      |           |           |       |            |            | 1    | 0     | 0    | 1     | 7036.865         | 0.013                             |   |   |   |   |           |        |
|      |           |           |       |            |            | 1    | 0     | 1    | 0     | 7037.443         | 0.002                             |   |   |   |   |           |        |
|      |           |           |       |            |            | 3    | 2     | 0    | 1     | 7595.631         | -0.010                            |   |   |   |   |           |        |
|      |           |           |       |            |            | 3    | 2     | 1    | 0     | 7596.241         | 0.011                             |   |   |   |   |           |        |
|      |           |           |       |            |            | 2    | 1     | 0    | 1     | 7594.632         | -0.003                            |   |   |   |   |           |        |
|      |           |           |       |            |            | 2    | 1     | 1    | 0     | 7595.203         | -0.022                            |   |   |   |   |           |        |
| 2    | 1         | 2         | 1     | 0          | 1          | 1    | 0     | 0    | 1     | 7596.637         | -0.016                            |   |   |   |   |           |        |
|      |           |           |       |            |            | 1    | 0     | 1    | 0     | 7597.239         | -0.002                            |   |   |   |   |           |        |
|      |           |           |       |            |            | 3    | 2     | 0    | 0     | 12746.432        | -0.004                            |   |   |   |   |           |        |
|      |           |           |       |            |            | 3    | 2     | 1    | 1     | 12746.432        | -0.004                            |   |   |   |   |           |        |
|      |           |           |       |            |            | 2    | 1     | 0    | 0     | 12746.890        | -0.005                            |   |   |   |   |           |        |
|      |           |           |       |            |            | 2    | 1     | 1    | 1     | 12746.890        | -0.005                            |   |   |   |   |           |        |
|      |           |           |       |            |            | 1    | 0     | 0    | 0     | 12745.261        | 0.000                             |   |   |   |   |           |        |
|      |           |           |       |            |            | 1    | 0     | 1    | 1     | 12745.261        | 0.000                             |   |   |   |   |           |        |
|      |           |           |       |            |            | 2    | 2     | 0    | 0     | 12745.924        | 0.005                             |   |   |   |   |           |        |
|      |           |           |       |            |            | 2    | 2     | 1    | 1     | 12745.924        | 0.005                             |   |   |   |   |           |        |
|      |           |           |       |            |            | 1    | 1     | 0    | 0     | 12747.688        | -0.013                            |   |   |   |   |           |        |
|      |           |           |       |            |            | 1    | 1     | 1    | 1     | 12747.688        | -0.013                            |   |   |   |   |           |        |
| 2    | 1         | 1         | 1     | 0          | 1          | 3    | 2     | 0    | 0     | 13586.152        | 0.009                             |   |   |   |   |           |        |
|      |           |           |       |            |            | 3    | 2     | 1    | 1     | 13586.152        | 0.009                             |   |   |   |   |           |        |
|      |           |           |       |            |            | 2    | 1     | 0    | 0     | 13586.595        | 0.005                             |   |   |   |   |           |        |
|      |           |           |       |            |            | 2    | 1     | 1    | 1     | 13586.595        | 0.005                             |   |   |   |   |           |        |
|      |           |           |       |            |            | 1    | 0     | 0    | 0     | 13584.989        | 0.013                             |   |   |   |   |           |        |
|      |           |           |       |            |            | 1    | 0     | 1    | 1     | 13584.989        | 0.013                             |   |   |   |   |           |        |
|      |           |           |       |            |            | 2    | 2     | 0    | 0     | 13585.001        | 0.005                             |   |   |   |   |           |        |
|      |           |           |       |            |            | 2    | 2     | 1    | 1     | 13585.001        | 0.005                             |   |   |   |   |           |        |
|      |           |           |       |            |            | 1    | 1     | 0    | 0     | 13587.415        | 0.003                             |   |   |   |   |           |        |
|      |           |           |       |            |            | 1    | 1     | 1    | 1     | 13587.415        | 0.003                             |   |   |   |   |           |        |
|      |           |           |       |            |            | 3    | 0     | 3    | 2     | 0                | 2                                 | 4 | 3 | 0 | 1 | 10933.392 | -0.024 |
|      |           |           |       |            |            |      |       |      |       |                  |                                   | 4 | 3 | 1 | 0 | 10933.987 | -0.018 |
| 3    | 3         | 0         | 1     | 10932.345  | 0.004      |      |       |      |       |                  |                                   |   |   |   |   |           |        |
| 3    | 3         | 1         | 0     | 10932.931  | 0.002      |      |       |      |       |                  |                                   |   |   |   |   |           |        |
| 2    | 2         | 0         | 1     | 10934.828  | -0.004     |      |       |      |       |                  |                                   |   |   |   |   |           |        |
| 2    | 2         | 1         | 0     | 10935.424  | 0.004      |      |       |      |       |                  |                                   |   |   |   |   |           |        |

|   |   |   |   |   |   |   |   |   |   |           |        |
|---|---|---|---|---|---|---|---|---|---|-----------|--------|
| 3 | 1 | 3 | 2 | 1 | 2 | 4 | 3 | 0 | 1 | 10547.489 | -0.011 |
|   |   |   |   |   |   | 4 | 3 | 1 | 0 | 10548.091 | 0.002  |
|   |   |   |   |   |   | 3 | 2 | 0 | 1 | 10547.214 | 0.002  |
|   |   |   |   |   |   | 3 | 2 | 1 | 0 | 10547.792 | -0.008 |
| 3 | 1 | 2 | 2 | 1 | 1 | 4 | 3 | 0 | 1 | 11386.982 | -0.010 |
|   |   |   |   |   |   | 4 | 3 | 1 | 0 | 11387.584 | 0.003  |
|   |   |   |   |   |   | 3 | 2 | 0 | 1 | 11386.709 | 0.006  |
|   |   |   |   |   |   | 3 | 2 | 1 | 0 | 11387.309 | 0.017  |
| 3 | 2 | 2 | 2 | 2 | 1 | 4 | 3 | 0 | 1 | 10973.630 | -0.003 |
|   |   |   |   |   |   | 4 | 3 | 1 | 0 | 10974.215 | 0.007  |
|   |   |   |   |   |   | 3 | 2 | 0 | 1 | 10972.594 | 0.002  |
|   |   |   |   |   |   | 3 | 2 | 1 | 0 | 10973.193 | 0.012  |
|   |   |   |   |   |   | 2 | 1 | 0 | 1 | 10974.215 | 0.007  |
|   |   |   |   |   |   | 2 | 1 | 1 | 0 | 10974.810 | 0.011  |
| 3 | 2 | 1 | 2 | 2 | 0 | 4 | 3 | 0 | 1 | 11013.706 | 0.001  |
|   |   |   |   |   |   | 3 | 2 | 0 | 1 | 11012.667 | 0.004  |
|   |   |   |   |   |   | 3 | 2 | 1 | 0 | 11013.266 | 0.015  |
| 3 | 1 | 3 | 2 | 0 | 2 | 4 | 3 | 0 | 0 | 15988.355 | -0.006 |
|   |   |   |   |   |   | 4 | 3 | 1 | 1 | 15988.355 | -0.006 |
|   |   |   |   |   |   | 3 | 2 | 0 | 0 | 15988.593 | 0.001  |
|   |   |   |   |   |   | 3 | 2 | 1 | 1 | 15988.593 | 0.001  |
|   |   |   |   |   |   | 2 | 1 | 0 | 0 | 15988.058 | -0.002 |
|   |   |   |   |   |   | 2 | 1 | 1 | 1 | 15988.058 | -0.002 |
| 4 | 0 | 4 | 3 | 0 | 3 | 5 | 4 | 0 | 1 | 14531.746 | 0.014  |
|   |   |   |   |   |   | 5 | 4 | 1 | 0 | 14532.343 | 0.023  |
|   |   |   |   |   |   | 4 | 4 | 0 | 1 | 14530.662 | 0.027  |
|   |   |   |   |   |   | 4 | 4 | 1 | 0 | 14531.235 | 0.012  |
|   |   |   |   |   |   | 3 | 3 | 0 | 1 | 14533.109 | 0.019  |
|   |   |   |   |   |   | 3 | 3 | 1 | 0 | 14533.694 | 0.015  |
| 4 | 1 | 4 | 3 | 1 | 3 | 5 | 4 | 0 | 1 | 14052.108 | -0.024 |
|   |   |   |   |   |   | 5 | 4 | 1 | 0 | 14052.694 | -0.027 |
|   |   |   |   |   |   | 3 | 3 | 0 | 1 | 14053.190 | 0.017  |
|   |   |   |   |   |   | 3 | 3 | 1 | 0 | 14053.794 | 0.033  |
| 4 | 1 | 3 | 3 | 1 | 2 | 5 | 4 | 0 | 1 | 15170.407 | 0.002  |
|   |   |   |   |   |   | 5 | 4 | 1 | 0 | 15170.932 | -0.061 |
| 5 | 1 | 5 | 4 | 1 | 4 | 6 | 5 | 0 | 1 | 17547.806 | -0.007 |
|   |   |   |   |   |   | 6 | 5 | 1 | 0 | 17548.386 | -0.015 |

---

**Table S6.** Measured frequencies and residuals (in MHz) for the rotational transitions of conformer **ag1** of serinol.

| $J'$ | $K'_{-1}$ | $K'_{+1}$ | $J''$ | $K''_{-1}$ | $K''_{+1}$ | $F'$ | $F''$ | $\nu_{\text{obs}}$ | $\nu_{\text{obs}} - \nu_{\text{cal}}$ |
|------|-----------|-----------|-------|------------|------------|------|-------|--------------------|---------------------------------------|
| 1    | 1         | 1         | 0     | 0          | 0          | 2    | 1     | 7090.148           | -0.001                                |
|      |           |           |       |            |            | 1    | 1     | 7090.830           | 0.006                                 |
|      |           |           |       |            |            | 0    | 1     | 7089.126           | -0.009                                |
| 1    | 1         | 0         | 0     | 0          | 0          | 2    | 1     | 7694.276           | -0.007                                |
|      |           |           |       |            |            | 1    | 1     | 7694.782           | 0.007                                 |
|      |           |           |       |            |            | 0    | 1     | 7693.563           | 0.022                                 |
| 2    | 0         | 2         | 1     | 0          | 1          | 3    | 2     | 8176.740           | 0.020                                 |
|      |           |           |       |            |            | 1    | 0     | 8175.680           | 0.036                                 |
|      |           |           |       |            |            | 1    | 1     | 8178.567           | 0.000                                 |
| 2    | 1         | 2         | 1     | 1          | 1          | 3    | 2     | 7656.134           | -0.008                                |
|      |           |           |       |            |            | 2    | 1     | 7654.926           | -0.012                                |
|      |           |           |       |            |            | 1    | 0     | 7657.429           | -0.020                                |
|      |           |           |       |            |            | 1    | 1     | 7655.790           | 0.029                                 |
| 2    | 1         | 1         | 1     | 1          | 0          | 3    | 2     | 8864.350           | -0.011                                |
|      |           |           |       |            |            | 2    | 1     | 8863.139           | -0.005                                |
|      |           |           |       |            |            | 1    | 0     | 8865.513           | 0.009                                 |
|      |           |           |       |            |            | 2    | 2     | 8863.623           | -0.015                                |
| 2    | 1         | 2         | 1     | 0          | 1          | 3    | 2     | 10616.074          | -0.009                                |
|      |           |           |       |            |            | 2    | 1     | 10616.719          | -0.004                                |
|      |           |           |       |            |            | 1    | 1     | 10617.548          | 0.002                                 |
| 2    | 1         | 1         | 1     | 0          | 1          | 3    | 2     | 12428.444          | 0.009                                 |
|      |           |           |       |            |            | 2    | 1     | 12428.905          | 0.024                                 |
|      |           |           |       |            |            | 1    | 0     | 12427.083          | -0.001                                |
|      |           |           |       |            |            | 2    | 2     | 12427.707          | -0.004                                |
| 3    | 0         | 3         | 2     | 0          | 2          | 4    | 3     | 12066.566          | -0.010                                |
|      |           |           |       |            |            | 3    | 2     | 12066.566          | -0.010                                |
|      |           |           |       |            |            | 3    | 3     | 12065.360          | 0.012                                 |
|      |           |           |       |            |            | 2    | 2     | 12068.210          | -0.000                                |
| 3    | 1         | 3         | 2     | 1          | 2          | 4    | 3     | 11434.986          | 0.001                                 |
|      |           |           |       |            |            | 2    | 1     | 11434.986          | 0.001                                 |
|      |           |           |       |            |            | 3    | 2     | 11434.647          | -0.000                                |
|      |           |           |       |            |            | 3    | 3     | 11434.134          | 0.015                                 |
|      |           |           |       |            |            | 2    | 2     | 11435.825          | 0.012                                 |
| 3    | 1         | 2         | 2     | 1          | 1          | 4    | 3     | 13240.013          | -0.011                                |
|      |           |           |       |            |            | 3    | 2     | 13239.668          | -0.016                                |
|      |           |           |       |            |            | 3    | 3     | 13238.936          | -0.025                                |
|      |           |           |       |            |            | 2    | 2     | 13241.118          | -0.001                                |
| 3    | 2         | 2         | 2     | 2          | 1          | 4    | 3     | 12390.290          | 0.010                                 |
|      |           |           |       |            |            | 3    | 2     | 12389.020          | -0.007                                |
|      |           |           |       |            |            | 2    | 1     | 12390.979          | 0.003                                 |
| 3    | 2         | 1         | 2     | 2          | 0          | 4    | 3     | 12713.747          | 0.007                                 |
|      |           |           |       |            |            | 3    | 2     | 12712.441          | 0.003                                 |
|      |           |           |       |            |            | 2    | 1     | 12714.455          | 0.009                                 |
| 3    | 0         | 3         | 2     | 1          | 2          | 4    | 3     | 9627.185           | -0.017                                |
|      |           |           |       |            |            | 3    | 2     | 9626.507           | -0.007                                |
|      |           |           |       |            |            | 3    | 3     | 9625.981           | -0.004                                |
|      |           |           |       |            |            | 2    | 2     | 9628.159           | 0.002                                 |
| 3    | 1         | 3         | 2     | 0          | 2          | 4    | 3     | 13874.333          | -0.011                                |
|      |           |           |       |            |            | 3    | 2     | 13874.694          | -0.006                                |
|      |           |           |       |            |            | 2    | 1     | 13873.960          | -0.009                                |
|      |           |           |       |            |            | 3    | 3     | 13873.481          | -0.000                                |
|      |           |           |       |            |            | 2    | 2     | 13875.860          | -0.007                                |
| 4    | 0         | 4         | 3     | 0          | 3          | 5    | 4     | 15767.059          | 0.011                                 |
| 4    | 1         | 4         | 3     | 1          | 3          | 5    | 4     | 15164.627          | -0.003                                |
| 4    | 1         | 3         | 3     | 1          | 2          | 5    | 4     | 17537.926          | -0.033                                |

|   |   |   |   |   |   |   |   |           |        |
|---|---|---|---|---|---|---|---|-----------|--------|
| 4 | 2 | 3 | 3 | 2 | 2 | 5 | 4 | 16454.991 | -0.015 |
|   |   |   |   |   |   | 4 | 3 | 16454.411 | 0.010  |
|   |   |   |   |   |   | 3 | 2 | 16454.991 | -0.015 |
|   |   |   |   |   |   | 5 | 4 | 17207.300 | 0.019  |
| 4 | 0 | 4 | 3 | 1 | 3 | 5 | 4 | 13959.270 | 0.018  |
|   |   |   |   |   |   | 4 | 3 | 13958.950 | 0.013  |
|   |   |   |   |   |   | 3 | 2 | 13959.270 | 0.018  |

---

**Fig S1.** The  $2_{1,2} \leftarrow 1_{1,1}$  rotational transition of conformer **aa1** of serinol. Each of the three quadrupole components (labelled with the quantum numbers  $F'' \leftarrow F'$ ,  $F = I + J$ ) show small tunneling splittings of about 600 kHz.

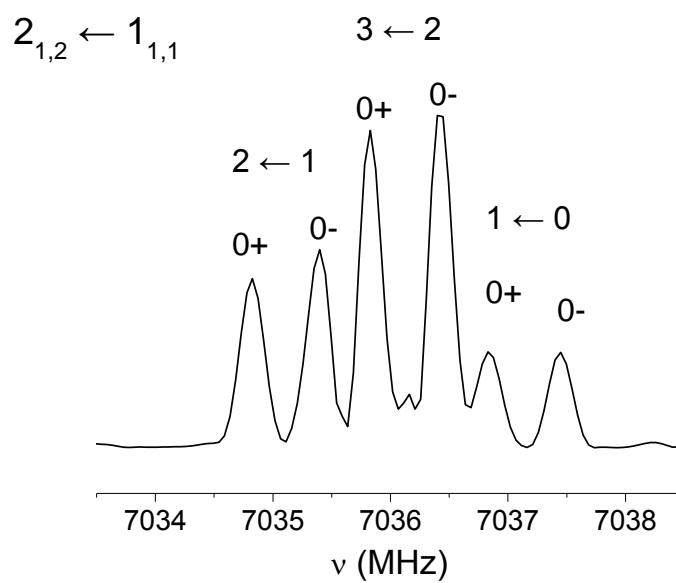

**Fig S2.** Interconversion barriers between conformers of the **ga** family of serinol calculated at the MP2/6-311++G(d,p) level of theory.

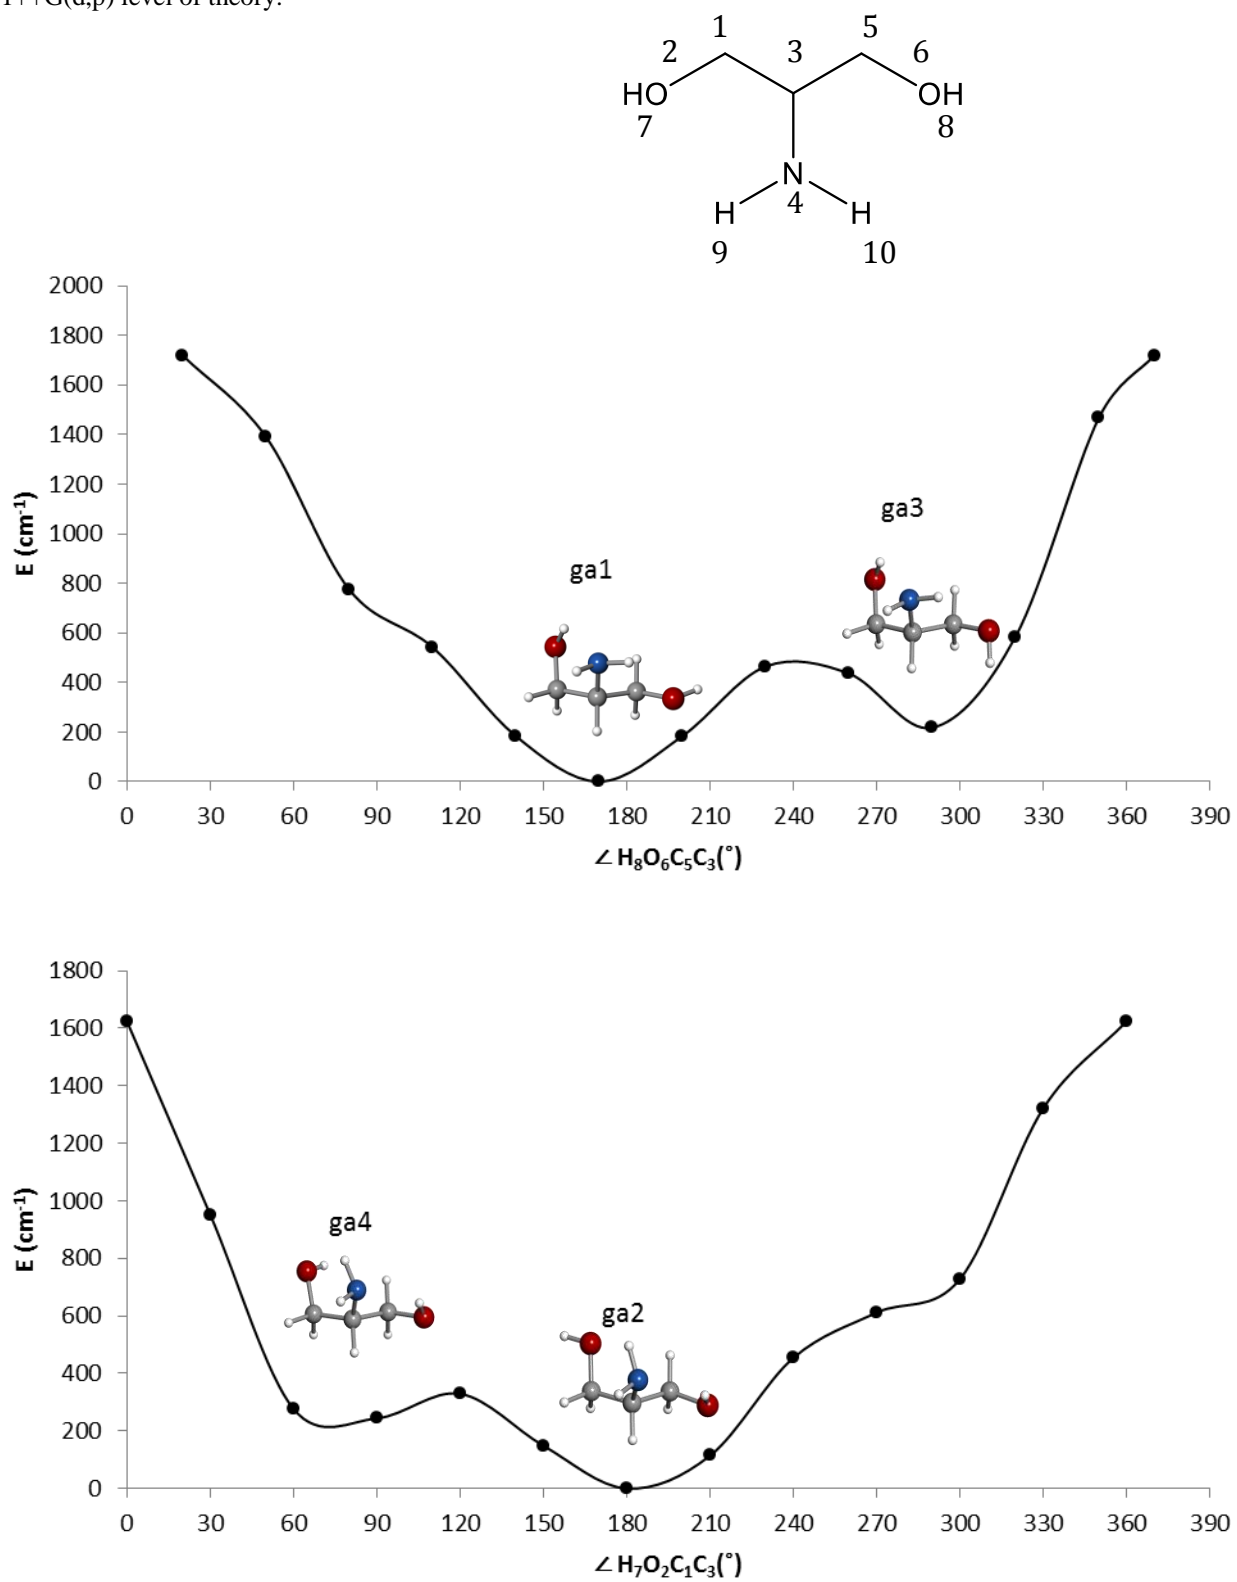

**Fig S3.** Interconversion barrier between conformers of the **aa** family of serinol calculated at the MP2/6-311++G(d,p) level of theory.

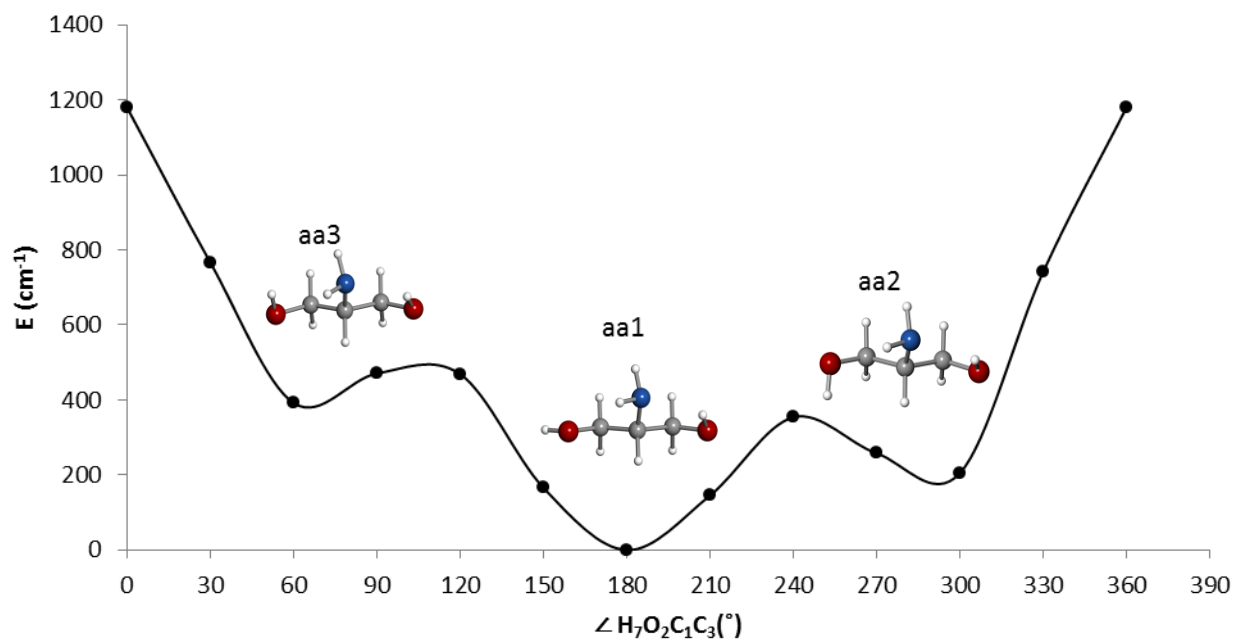



**Fig S4.** Interconversion barriers between conformers of the **ag** family of serinol calculated at the MP2/6-311++G(d,p) level of theory.

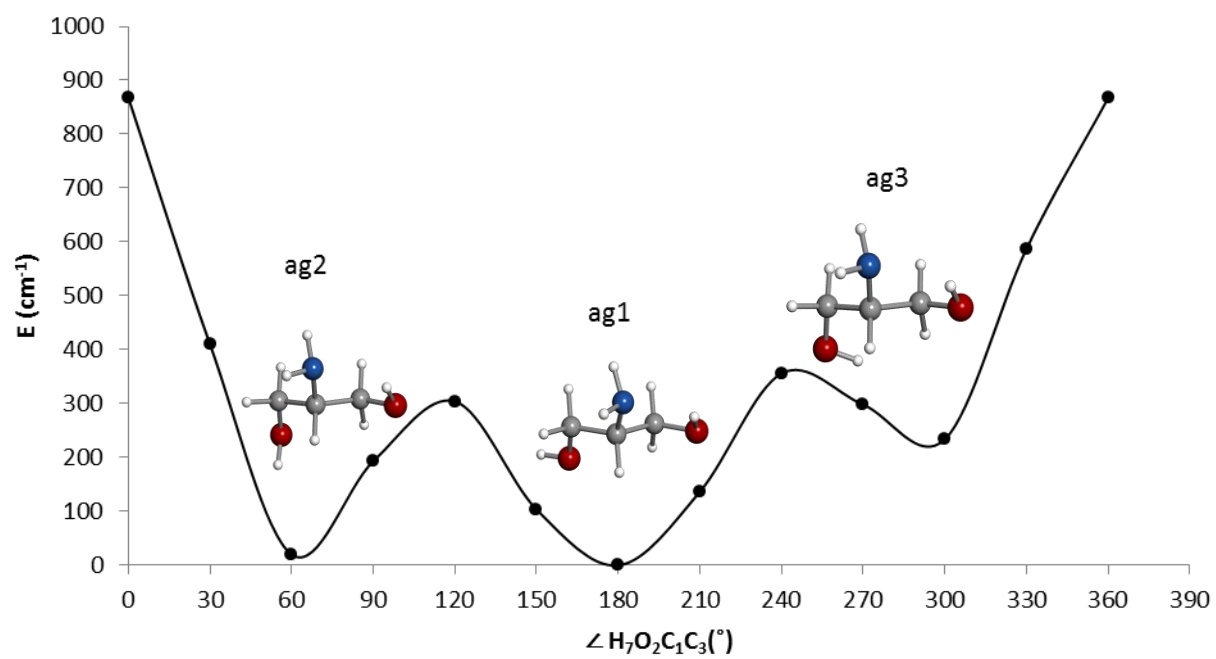

**Fig S5.** Interconversion barriers between conformers of the **gG** family of serinol calculated at the MP2/6-311++G(d,p) level of theory.

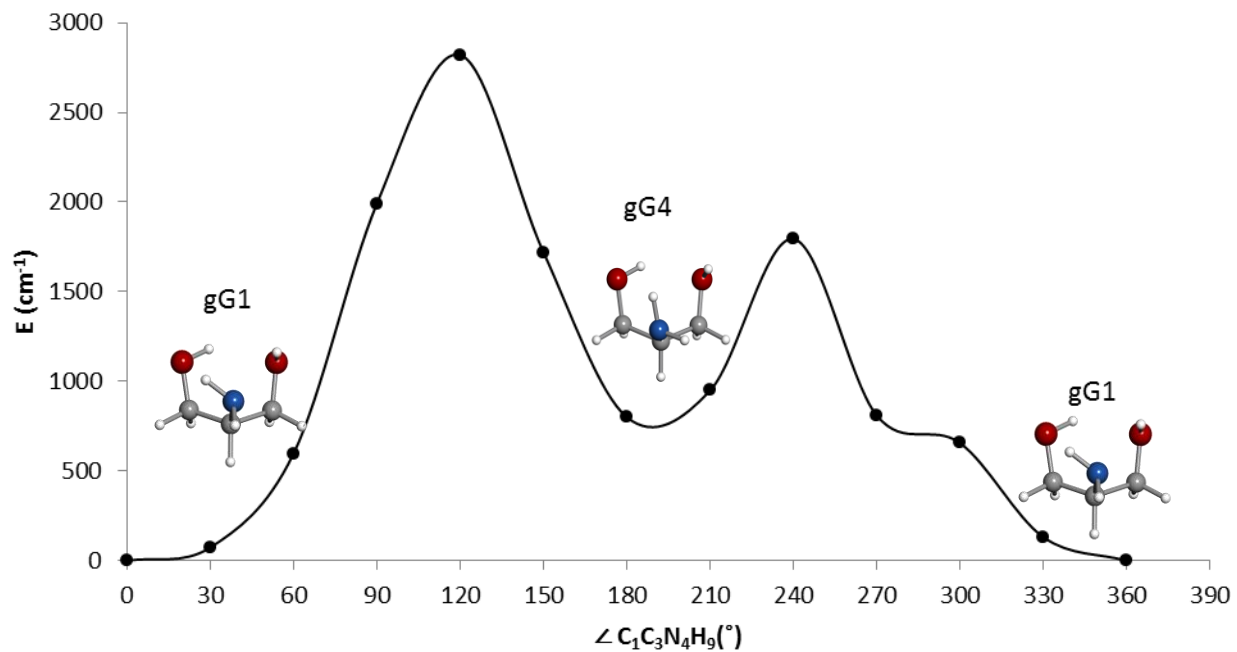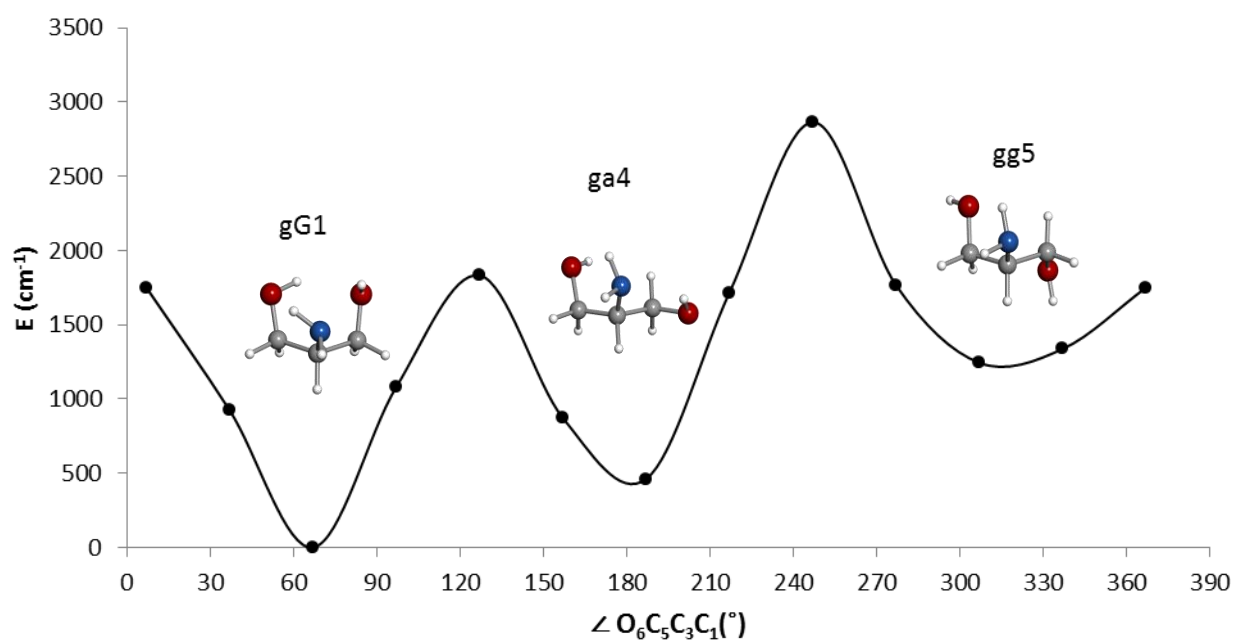

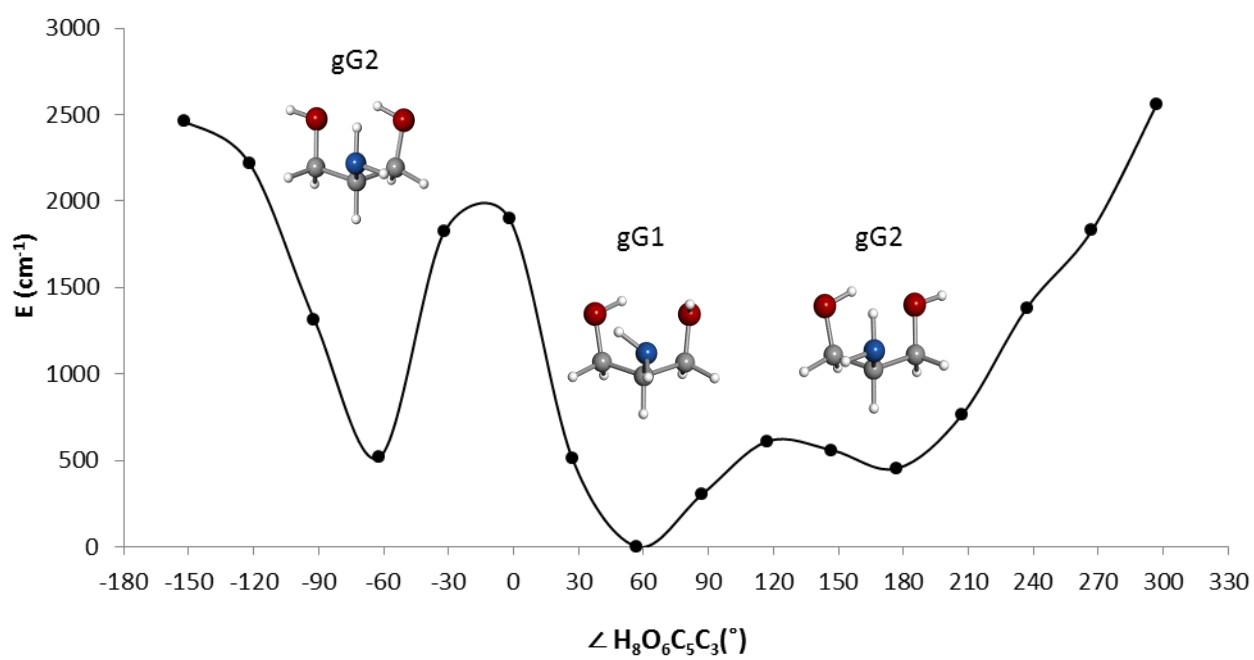

**Fig S6.** Possible tunneling pathways for the interconversion of the **aa1** enantiomers of serinol. The transition states have been calculated using the Synchronous Transit and Quasi-Newton method (C. Peng, H. B. Schlegel, *Israel J. Chem.*, **33** (1993) 449; C. Peng, P. Y. Ayala, H. B. Schlegel, M. J. Frisch, *J. Comp. Chem.*, **17** (1996) 49) implemented in Gaussian09 at the MP2/6-311++G(d,p) level of theory. Energies are relative to conformer **aa1**. Numbers in parentheses are the zero-point corrected energies.

a)

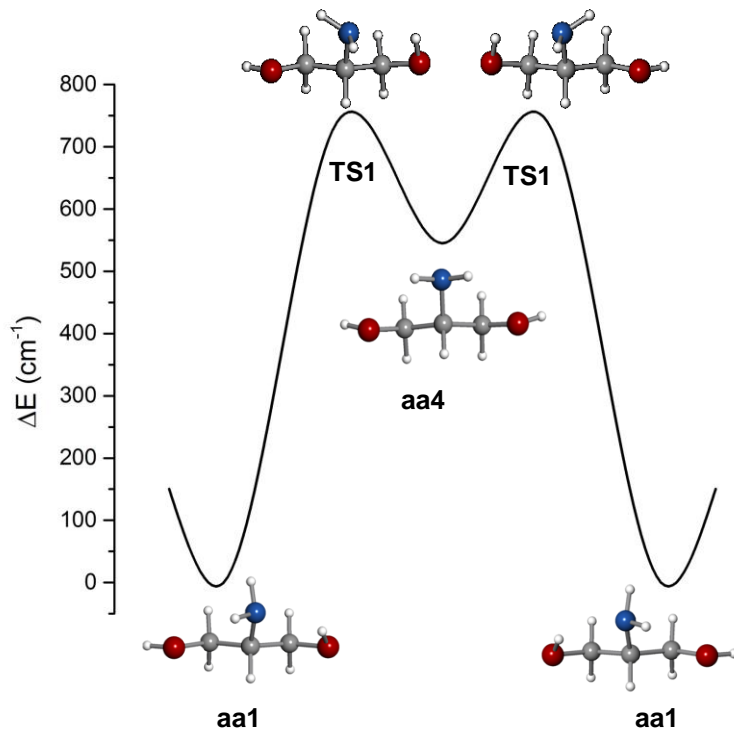

b)

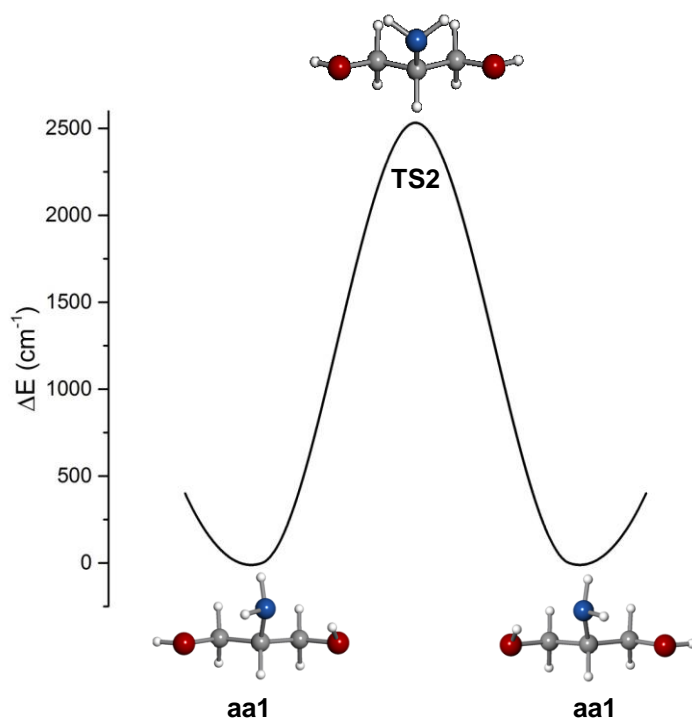

Supplement: c5cc09423b1.pdf [file c5cc09423b1.pdf]
